# Supplementary material for: Lead-free epitaxial ferroelectric material integration on semiconducting (100) Nb-doped SrTiO3 for low-power non-volatile memory and efficient ultraviolet ray detection
Source: PubMed Central journal article supplement (PMC5378894; doi:10.1038/srep12415), 2015-07-23
Supplement: srep12415-s1.pdf [file srep12415-s1.pdf]

## Supplementary Information

### **Lead-free epitaxial ferroelectric material integration on semiconducting (100) Nb-doped SrTiO<sub>3</sub> for low-power non-volatile memory and efficient ultraviolet ray detection**

Souvik Kundu<sup>1,\*</sup>, Michael Clavel<sup>2</sup>, Pranab Biswas<sup>3</sup>, Bo Chen<sup>1</sup>, Hyun-Cheol Song<sup>1</sup>, Prashant Kumar<sup>1</sup>, Nripendra N. Halder<sup>4</sup>, Mantu K. Hudait<sup>2</sup>, Pallab Banerji<sup>3</sup>, Mohan Sanghadasa<sup>5</sup>, and Shashank Priya<sup>1</sup>

<sup>1</sup>*Center for Energy Harvesting Materials and Systems (CEHMS), Department of Mechanical Engineering, Virginia Tech, Blacksburg, Virginia 24061, USA*

<sup>2</sup>*Advanced Devices & Sustainable Energy Laboratory (ADSEL), Bradley Department of Electrical and Computer Engineering, Virginia Tech, Blacksburg, Virginia 24061, USA*

<sup>3</sup>*Materials Science Centre, Indian Institute of Technology Kharagpur, Kharagpur 721302, India*

<sup>4</sup>*Advanced Technology Development Centre, Indian Institute of Technology Kharagpur, Kharagpur 721302, India*

<sup>5</sup>*U.S. Army Aviation & Missile Research Development & Engineering Center (AMRDEC) Redstone Arsenal, Huntsville, AL 35898, USA*

In our Pt/BT-BFO/Nb:STO devices, the conduction mechanisms were determined by fitting both the HRS and LRS I-V curves and are shown in Fig. S1. During HRS, the Ohmic conduction was responsible for current transport when the voltage was varied from 0 to 0.5 V (Fig. S1(a)). However, space charge limited conduction (SCLC) conduction mechanism comes into play when the higher voltage was applied from 0.6 to 3 V (Fig. S1(b)). During LRS, both the thermionic and thermionic field emission were responsible at low voltages (from 0 to 0.5 V). At higher voltages (1 to 3 V), SCLC conduction mechanism was responsible for the current transport.

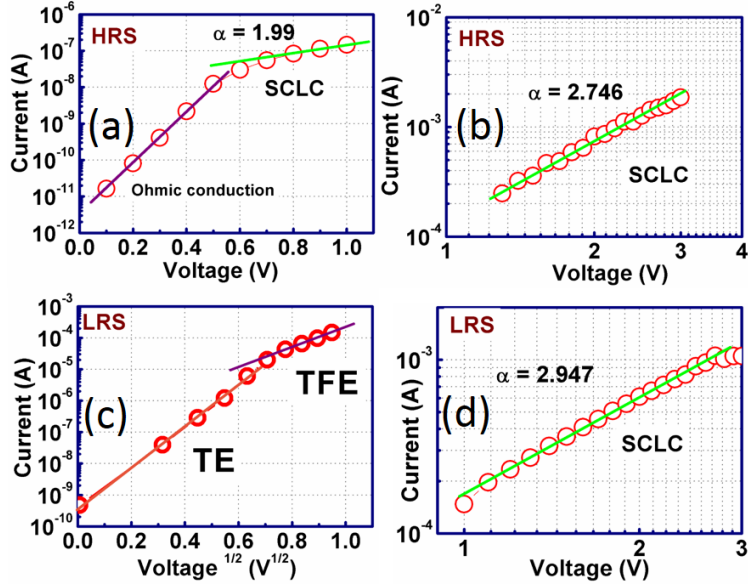

**Figure S1 | Transport properties.** During HRS, the I-V characteristics of Pt/BT-BFO/Nb:STO (a) from 0 to 0.5 V show that Ohmic conduction was responsible for the current transport. Whereas, from 0.5 to 1 V, the slope 1.99 indicates that the current was due to SCLC. However, from 1 to 3 V, the slope 2.746 depicts that the current is also due to SCLC. On the other hand, during LRS, (c) the I-V characteristics from 0 to 1 V, both the TE and TFE was responsible for the current transport, and (d) from 1 to 3 V, the slope 2.947 represents that the current was mainly due to SCLC.

Figure S2 shows the transmission spectrum of BT-BFO and a sharp absorption peak around 423 nm was found which is attributed to the direct band-to-band transition. Well known Tauc's relationship has been utilized to determine the bandgap of BT-BFO and the value was found to be 3 eV. The XPS survey spectra were recorded from Nb:STO substrates (Fig. S3(a)) and thick BT-BFO (Fig. S3(b)) films for a binding energy range of 0 eV to 800 eV. The Nb-related peaks were absent during XPS scan from Nb:STO, because the doping concentration of Nb (0.7%) is way below the XPS detection limits. To further verify the presence of Nb within the as-deposited BT-BFO, SIMS depth profiling was performed and the presence of Nb was identified (see Fig. S4).

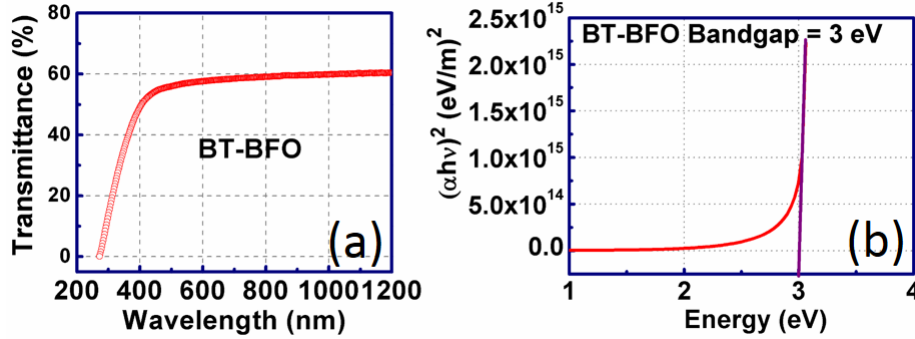

**Figure S2 | Optical band-gap studies of BT-BFO thin films.** (a) Transmission spectra for BT-BFO thin films deposited on glass substrate. A sharp absorption peak found around 423 nm can be attributed to the direct band-to-band transition; and (b)  $(\alpha h\nu)^2$  vs  $h\nu$  to determine the optical bandgap of BT-BFO and it was found to be 3 eV.

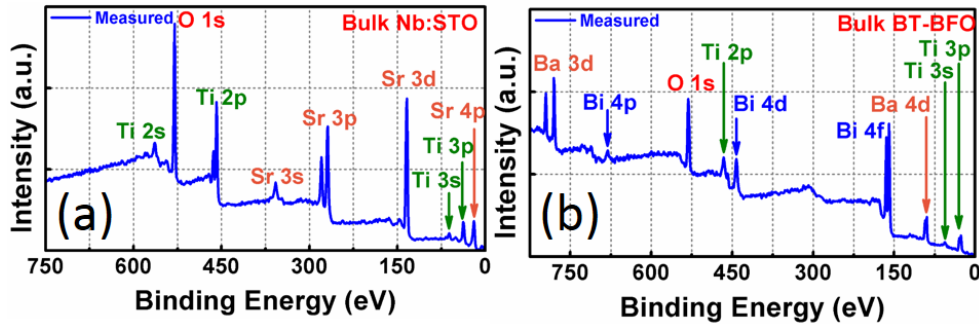

**Figure S3 | Surface survey spectra using XPS.** (a) Survey spectrum for Nb:STO substrates; and (b) survey spectrum for BT-BFO thin film.

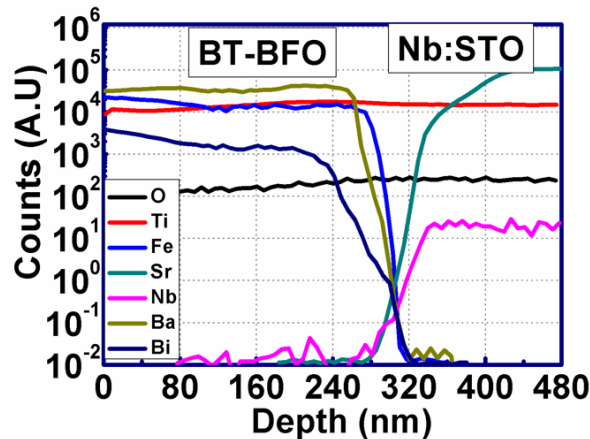

**Figure S4 | SIMS depth profile of a 300 nm BT-BFO films onto Nb:STO substrates.**
